# Supplementary material for: A Human Lin− CD123+ CD127low Population Endowed with ILC Features and Migratory Capabilities Contributes to Immunopathological Hallmarks of Psoriasis
Source: Front Immunol. 2017 Mar 2;8:176. doi: 10.3389/fimmu.2017.00176 (PMC5332395; doi:10.3389/fimmu.2017.00176)
Supplement: Supplementary file 2 [file Table_1.xlsx]

## Sheet: Hoja2
Surface staining					Intracelullar staining
Lineage markers	Antibody	Fluorochrome	Clone	Brand	Transcriptional factors	Antibody	Fluorochrome	Clone	Brand
	Anti-CD3	FITC or PE	HIT3a	Biolegend San Diego, California		Anti-T-bet	PerCP-Cy5.5	4B10	Biolegend San Diego, California
	Anti-CD14	FITC or PE	HCD14	Biolegend San Diego, California		Anti-GATA3	AlexaFluor 488	L50-823	BD Biosciences, San Jose, California
	Anti-CD19	FITC or PE	HIB19	Biolegend San Diego, California		Anti-RORgt	APC	AFKJS-9	eBioscience-Affymetrix, Santa Clara, California
	Anti-CD94	FITC or PE	DX22	Biolegend San Diego, California		Anti-NFIL3	PE	MABA223	eBioscience-Affymetrix, Santa Clara, California
	Anti-HLA-DR	FITC or PE	L243	Biolegend San Diego, California		Anti-PLZF	FITC	Mags.21F7	eBioscience-Affymetrix, Santa Clara, California
Additional lineage markers	Anti-CD34	FITC	561	Biolegend San Diego, California		Anti-TOX	APC	TXRX10	eBioscience-Affymetrix, Santa Clara, California
	Anti-TCR α/β	FITC	IP26	Biolegend San Diego, California		Anti-TCF-1	AlexaFluor 647	7F11A10	Biolegend San Diego, California
	Anti-CD66	FITC	B1.1/CD66	BD Biosciences, San Jose, California	Cytokines	Anti-IL-2	APC	5344.11	BD Biosciences, San Jose, California
	Anti-IL5R	PE	A14	BD Biosciences, San Jose, California		Anti-IL-4	PerCP-Cy5.5	MP4-25D2	Biolegend San Diego, California
	Anti-CD177	PE	MEM-166	Biolegend San Diego, California		Anti-IL-8	APC	8CH	eBioscience-Affymetrix, Santa Clara, California
	Anti-CD16	PE	3G8	Biolegend San Diego, California		Anti-IL-17	AlexaFluor 488	eBio64DEC17	eBioscience-Affymetrix, Santa Clara, California
	Anti FceR	FITC/PECy7	AER-37(CRA-1)	Biolegend San Diego, California		Anti-IL-22	eFluor660	22URTI	Biolegend San Diego, California
Dendritic cells markers	Anti-BDCA-1	APC	AD5-8E7	Miltenyi Biotec, BG, Germany		Anti-IFN-g	PerCP-Cy5.5	4S.B3	Biolegend San Diego, California
	Anti-BDCA-2	APC	AC144	Miltenyi Biotec, BG, Germany		Anti-IL-13	PerCP-Cy5.5	JES10-5A2	Biolegend San Diego, California
	Anti-BDCA-3	Biotin	AD5-14H12	Miltenyi Biotec, BG, Germany		Streptavidin	PE-Cy7		BD Biosciences, San Jose, California
	Anti-BDCA-4	Biotin	AD5-17F6	Miltenyi Biotec, BG, Germany		Streptavidin	APC-Cy7		BD Biosciences, San Jose, California
	Anti-CD11c	APC	S-HCL-3	BD Biosciences, San Jose, California
Homing molecules	Anti-CLA	Biotin	HECA-452	BD Biosciences, San Jose, California	Cell culture	Stimuli	Concentration	Company
	Anti-CCR6	PE	TG7/CCR6	Biolegend San Diego, California		IL-3	10 ng/mL	PeproTech, New Jersey,USA.
	Anti-CXCR4	APC	12G5	Biolegend San Diego, California		IL-7	50 ng/mL	PeproTech, New Jersey,USA.
	Anti-CD62L	FITC	SK11	BD Biosciences, San Jose, California	ILC1	IL-12	50 ng/mL	PeproTech, New Jersey,USA.
ILCs markers	Anti-CD123	Biotin/PE/PE-Cy5	6H6	Biolegend San Diego, California		IL-15	50 ng/mL	PeproTech, New Jersey,USA.
	Anti-CD127	Brilliant Violet 421	A019D5	Biolegend San Diego, California	ILC2	IL-2	30 ng/mL	PeproTech, New Jersey,USA.
	Anti-CD127	AlexaFluor 647	HIL-7R-M21	BD Biosciences, San Jose, California		IL-33	100 ng/mL	PeproTech, New Jersey,USA.
	Anti-CD90	PE-Cy7	5E10	Biolegend San Diego, California	ILC3	IL-2	30 ng/mL	PeproTech, New Jersey,USA.
	Anti-CD132	APC	TUGh4	Biolegend San Diego, California		IL-1b	50 ng/mL	PeproTech, New Jersey,USA.
	Anti-CD161	PE-Cy7	HP3G10	Biolegend San Diego, California		IL-23	50 ng/mL	PeproTech, New Jersey,USA.
	Anti-CRTH2	APC-Cy7/Biotin	BM16	Biolegend San Diego, California
	Anti-CD117 (c-kit)	PE-Cy5	A3C6E2	Biolegend San Diego, California			Migration assay
	Anti-NKp44	APC	P44-8	Biolegend San Diego, California		SDF-1	100 ng/mL	(R&D systems, Minneapolis, USA)
	Anti-AhR	PE/eFluor660	FF3399	eBioscience-Affymetrix, Santa Clara, California		block anti-CXCR4	50 mg/mL	Biolegend San Diego, California
	Anti-IL-23R	PerCP	218213	(R&D systems, Minneapolis, USA),
	Anti-49d (alpha 4 integrin)	FITC	9F10	Biolegend San Diego, California		Cross-linking IgE assay
Basophil markers	Anti-CD203c	APC	NP4D6	Biolegend San Diego, California		Human IgE Myeloma	1mg/mL	Merck-Millipore, Massachusetts, USA
	Anti-CCR3	APC-Cy7	5E8	Biolegend San Diego, California		Mouse anti-human IgE (clone: G7-18)	2mg/mL	BD Biosciences, San Jose, California
	2D7	PE	Basophil/2D7	Biolegend San Diego, California
Magnetic Luminex Screening Assay	IL-33, CCL2, IL-22, IL-4,	IFN-g, CCL5, IL-17A, IL-13		(R&D systems, Minneapolis, USA),
	IL-2, IL-5, IL-19, IL-8	CCL17, IL-4
